# Supplementary material for: The Dopamine D5 receptor contributes to activation of cholinergic interneurons during L-DOPA induced dyskinesia
Source: Sci Rep. 2020 Feb 13;10:2542. doi: 10.1038/s41598-020-59011-5 (PMC7018760; doi:10.1038/s41598-020-59011-5)
Supplement: Supplementary file 1 — Supplementaryinformation [file 41598_2020_59011_MOESM1_ESM.pdf]

## **The Dopamine D5 receptor contributes to activation of cholinergic interneurons during L-DOPA induced dyskinesia**

Julia Castello<sup>\*ΦΣ</sup>, Marisol Cortés<sup>\*Σ</sup>, Lauren Malave<sup>\*</sup>, Andreas Kottmann<sup>\*</sup>, David R Sibley<sup>Ω</sup>, Eitan Friedman<sup>\*Φ</sup> and Heike Rebholz<sup>\*ΔΞΨ</sup>

<sup>\*</sup>Department of Molecular, Cellular & Biomedical Sciences, CUNY School of Medicine, New York, NY USA; <sup>Φ</sup>Ph.D. Programs in Biochemistry and Biology, The Graduate Center, CUNY, New York, USA; <sup>Ω</sup> Molecular Neuropharmacology Section, National Institute of Neurologic Disorders and Stroke, Intramural Research Program, National Institutes of Health, Bethesda, Maryland, USA; <sup>Δ</sup> Institut de Psychiatrie et Neurosciences de Paris (IPNP-INSERM), GHU PARIS psychiatrie et neurosciences, <sup>Ξ</sup>Danube Private University (DPU), Krems, Austria

<sup>Ψ</sup> **Corresponding Author:** Heike Rebholz, [heikerebholz@gmail.com](mailto:heikerebholz@gmail.com)

<sup>Σ</sup> these authors contributed equally

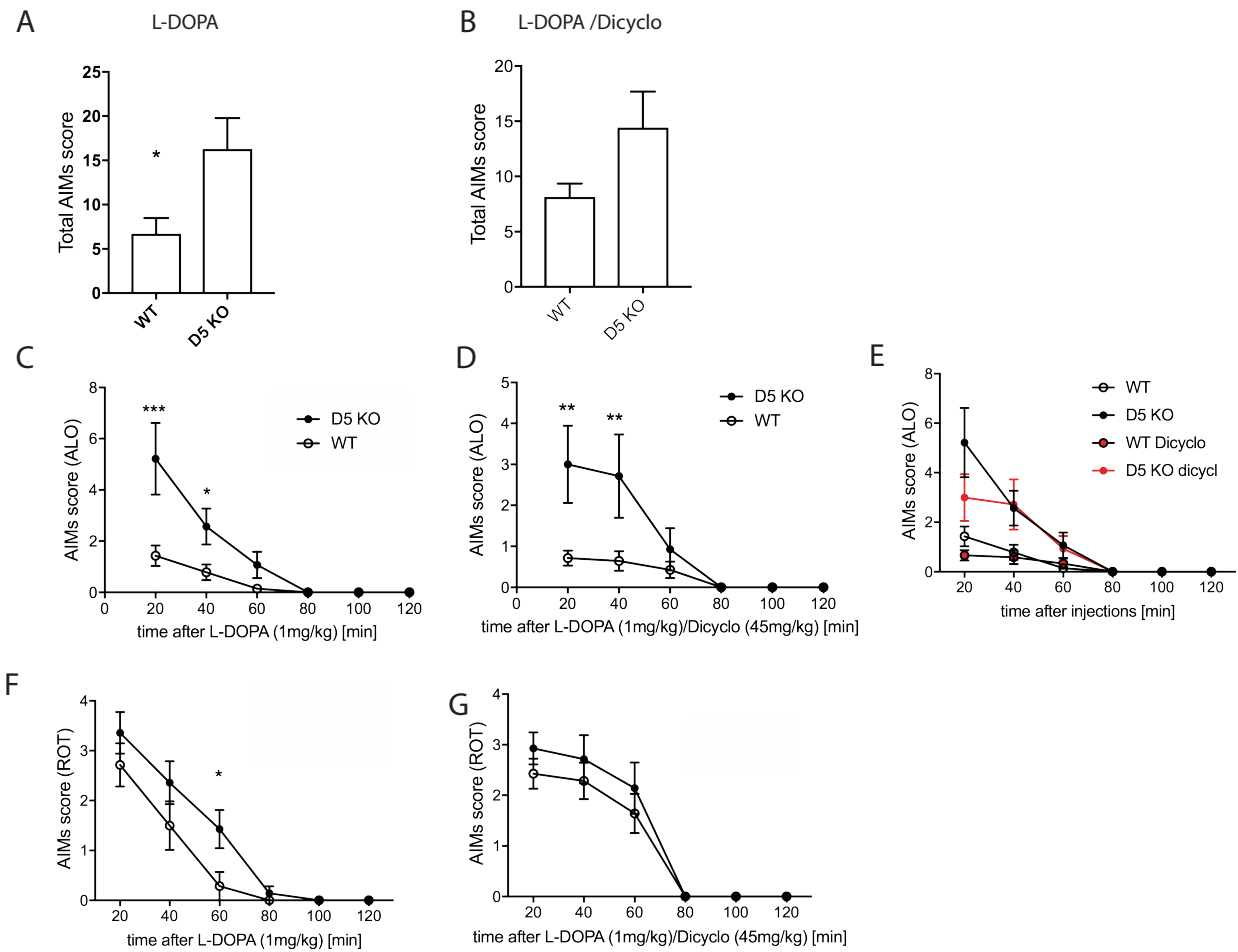

Fig. S1 Effect of low dose L-DOPA (1mg/kg) and dicyclomine on LID  
Mice were rendered dyskinetic with L-DOPA/ Benserazide (3mg/kg/ 10 mg/kg) and on day 34 were tested with low dose L-DOPA (1mg/kg) (A,C,F). Thereafter, L-DOPA (3mg/kg) was injected for 2 more days, after which L-DOPA (1mg/kg) and the M1 muscarinic receptor antagonist dicyclomine (45 mg/kg) were co-injected with L-DOPA and LID was assessed (B,D,E,G). N=7. Graphs show mean values  $\pm$  SEM. Statistical analysis was performed using Student's t-test for (A ( $p < 0.05$ ), B ( $p = 0.1$ ) and 2-way ANOVA (Effect of genotype C:  $F(1,72) = 14.1$ ,  $p = 0.0003$ , D:  $F(1,72) = 10.15$ ,  $p < 0.005$ ; F:  $F(1,72) = 7.46$ ,  $p < 0.01$ ; G:  $F(1,72) = 2.14$ ). Sidak's multiple comparisons post-test (\*\*\*,  $p < 0.001$ ; \*\*,  $p < 0.01$ , \*,  $p < 0.05$ ).

A

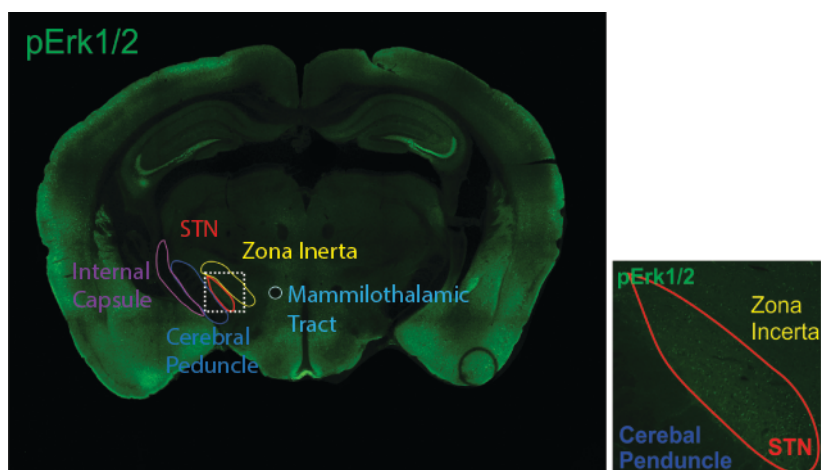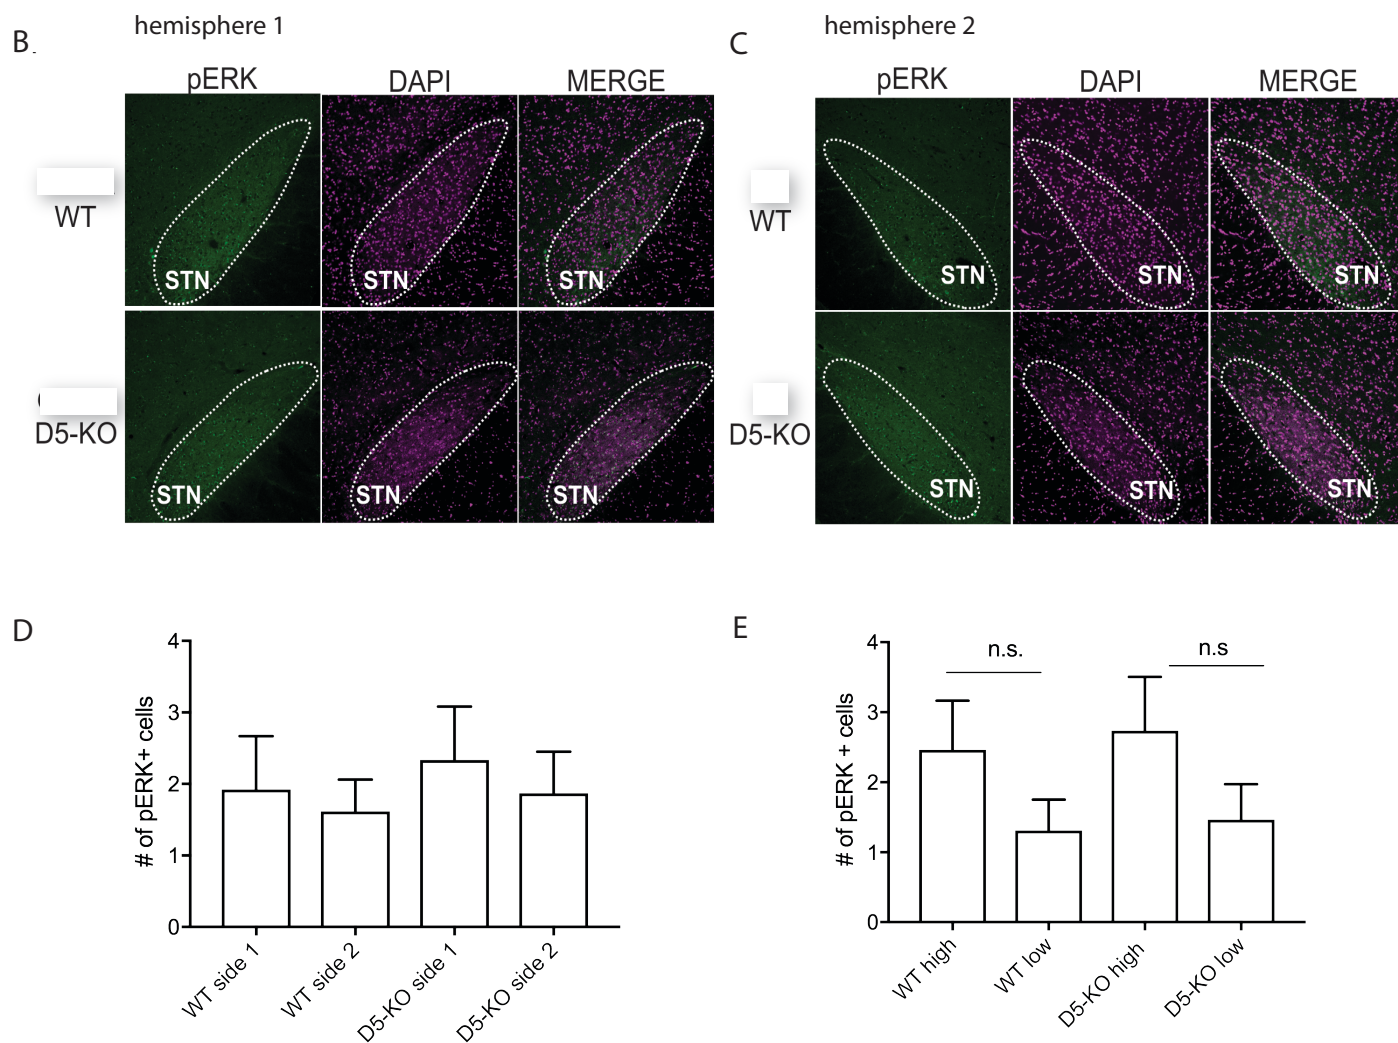

Fig. S2 Immunohistochemical analysis of pERK in the STN.

Scheme of the localisation of the STN in mouse coronal sections (A). Coronal slices comprising the midbrain region from WT and *Drd5*-KO mice were used for IHC with pERK and ChAT antibodies after chronic L-DOPA/Benserazide (3mg/kg/10mg/kg, i.p.) (B,C). Quantification: For analysis, slices were randomly assigned a hemisphere (D), or higher values of the pairs (left or right sides) were compounded and plotted (E). None of these analyses resulted in a significant difference between hemispheres or genotypes. Graphs show mean values  $\pm$  SEM. Statistical analysis was performed using 2-way ANOVA (N=7).

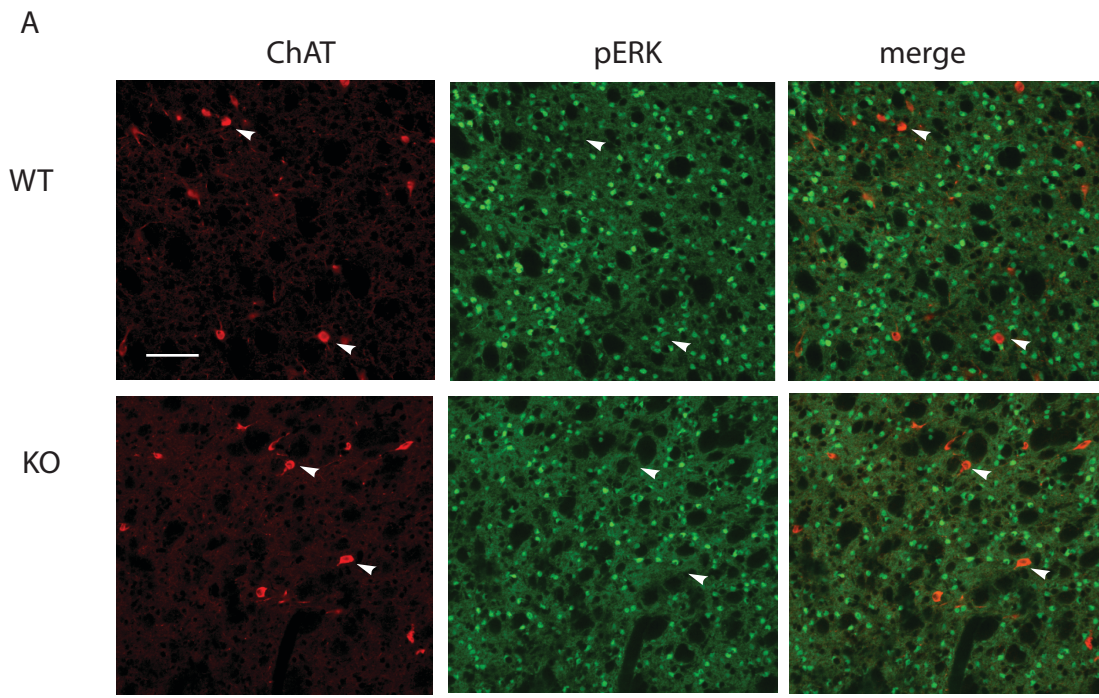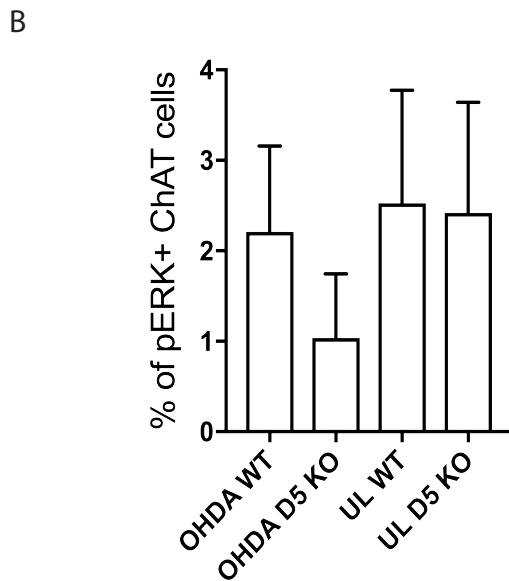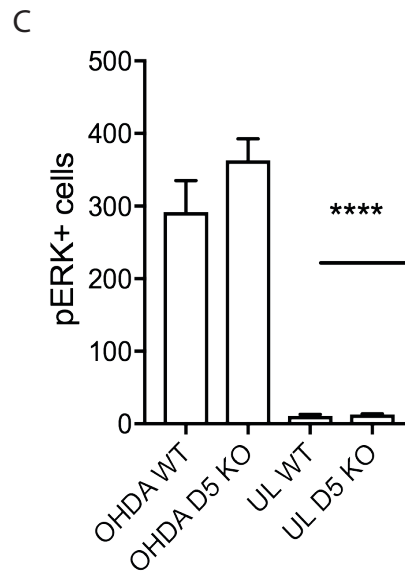

Fig. S3. Immunohistochemical analysis of pERK after acute L-DOPA. Coronal striatal slices from WT and Drd5-KO mice acutely treated with L-DOPA/Benserazide (3mg/kg/10mg/kg, i.p.), were used for IHC with pERK and ChAT antibodies (A). Quantification thereof (B, C). Scale bar 100  $\mu$ m, arrows point to CINs. Graphs show mean values  $\pm$  SEM. Statistical analysis was performed using 2-way ANOVA, \*\*\*\*,  $P < 0.0001$  (N=6).

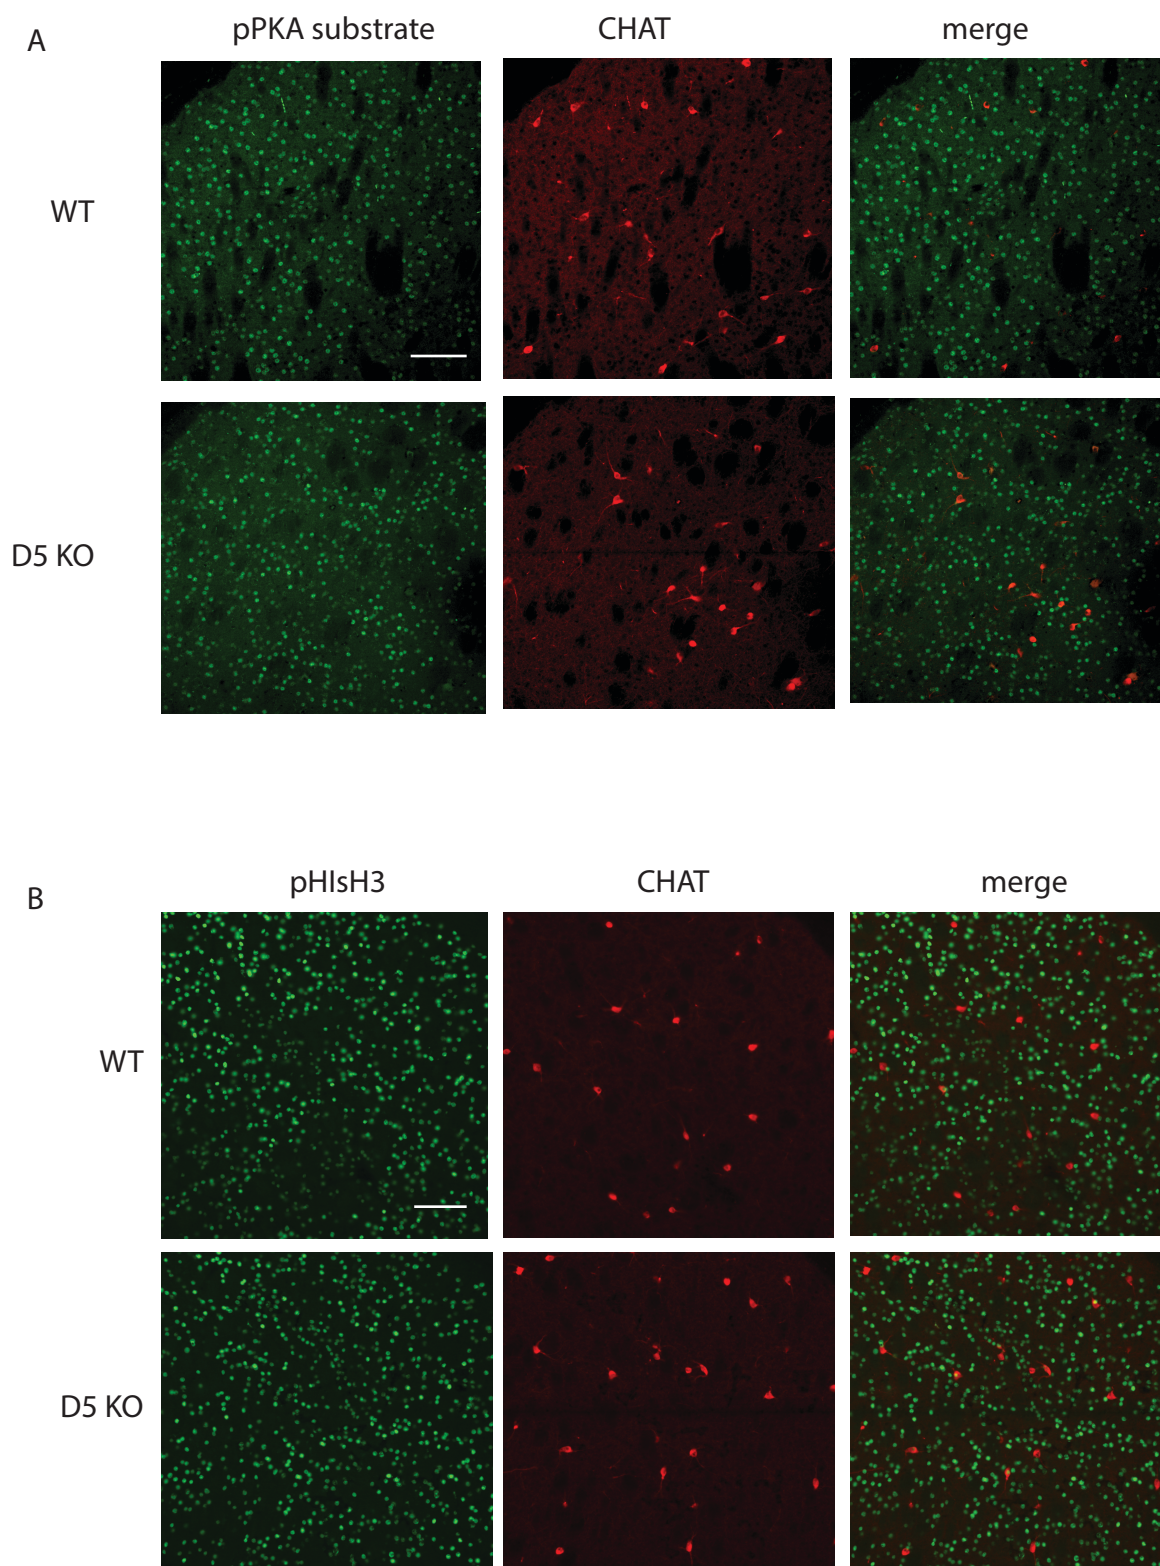

Fig. S4. Immunohistochemical analysis of coronal dorsolateral striatal slices from WT and Drd5-KO mice after chronic L-DOPA/Benserazide (3mg/kg/10mg/kg, i.p.) using pan-pPKA substrate (A) and pHisH3 antibodies (B). Scale bars 100  $\mu$ m.
